# Supplementary material
Source: Springer Nature journal article supplement (https://www.springermedizin.de/resource/supplementary/12891_2014_2395_MOESM2_ESM.pdf/9510016)

A

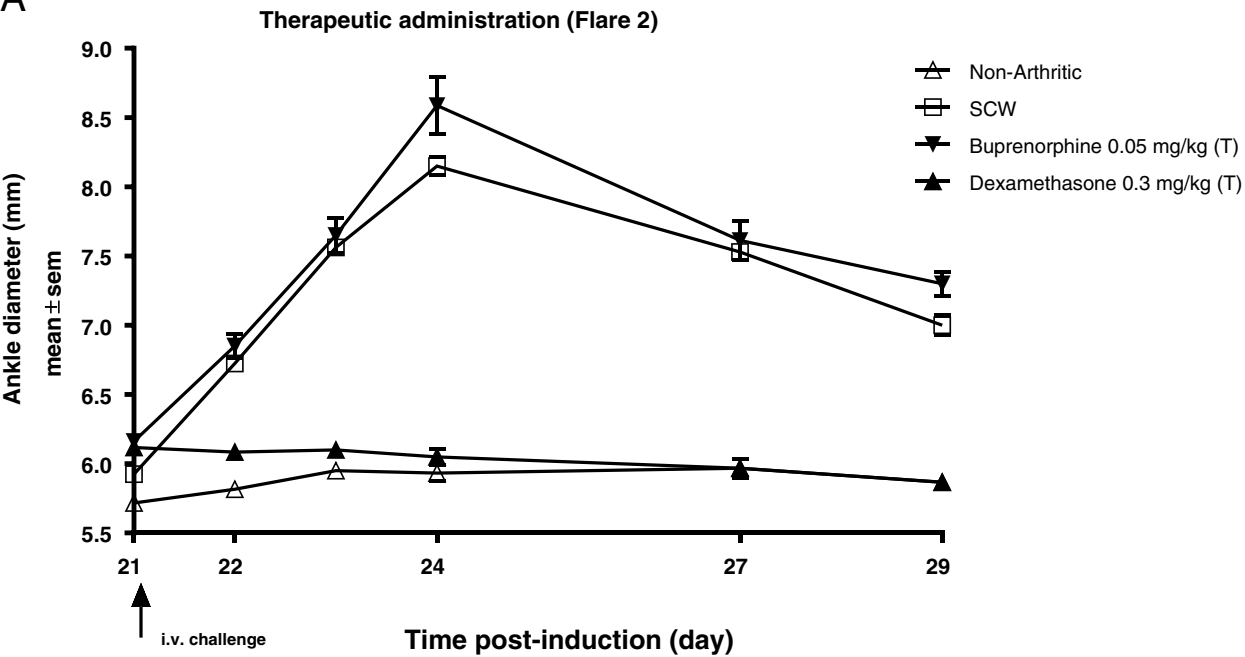

B

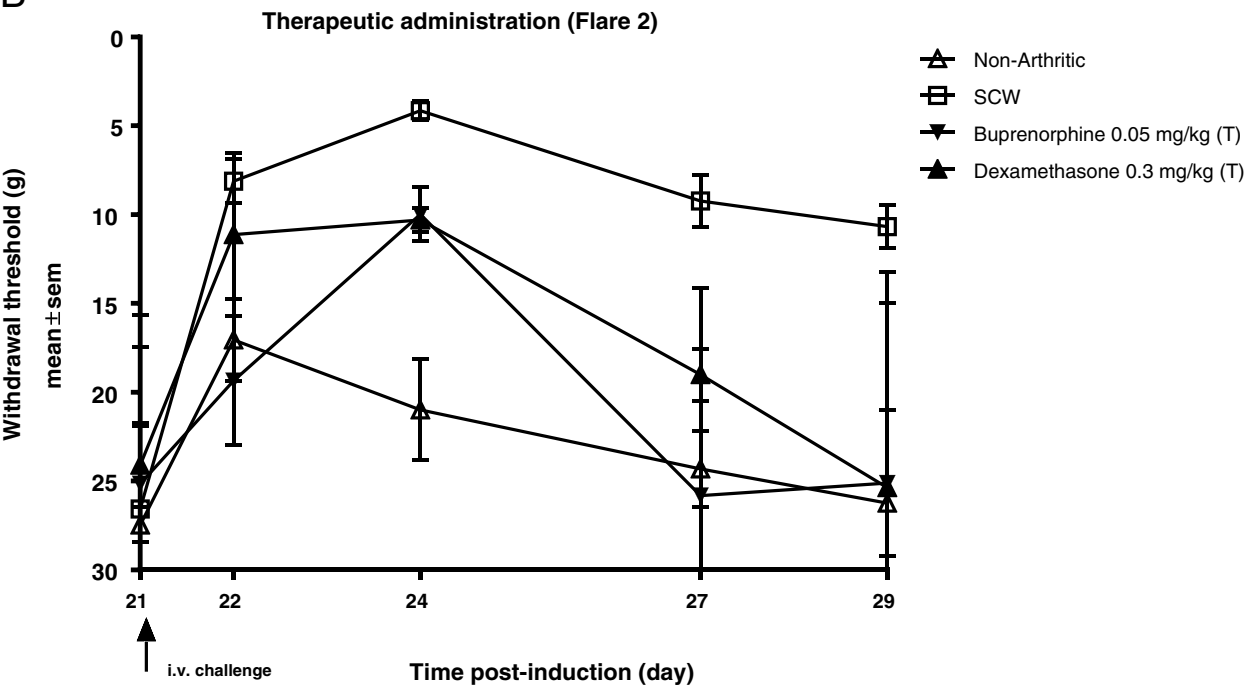

Supplement: MOESM2 [file 9510016]
